# Supplementary material
Source: HighWire-hosted journal article supplement (https://adc.bmj.com/content/106/9/911)
Supplement: inline-supplementary-material-1 [file inline-supplementary-material-1.pdf]

**Supplementary Table 1. Deaths of under 15 year olds registered in Scotland during epidemiological weeks 13 to 30 in 2016, 2017, 2018, 2019 and 2020.** Including the chapter (ICD-10) containing the underlying cause of death and age groups.

| <b>Diagnosis</b>                                       | <b>2016</b> | <b>2017</b> | <b>2018</b> | <b>2019</b> | <b>2020</b> |
|--------------------------------------------------------|-------------|-------------|-------------|-------------|-------------|
| Infectious and parasitic diseases                      | 3           | 4           | 4           | 1           | 1           |
| Neoplasms                                              | 10          | 10          | 7           | 6           | 5           |
| Disease of the nervous system                          | 3           | 4           | 3           | 5           | 2           |
| Diseases of the circulatory system                     | 2           | 6           | 1           | 3           | 0           |
| Diseases of the respiratory system                     | 1           | 0           | 2           | 2           | 2           |
| Perinatal and neonatal complications                   | 43          | 36          | 31          | 20          | 27          |
| Congenital malformations and chromosomal abnormalities | 19          | 17          | 10          | 17          | 15          |
| Sudden Infant Death Syndrome                           | 4           | 5           | 5           | 1           | 1           |
| External causes                                        | 9           | 7           | 5           | 1           | 8           |
| Other                                                  | 3           | 4           | 4           | 4           | 3           |
| Not yet classified                                     | 3           | 0           | 2           | 10          | 14          |
| <b>Total</b>                                           | <b>100</b>  | <b>93</b>   | <b>74</b>   | <b>70</b>   | <b>78</b>   |
